1 **Title**

2 A novel environmental DNA (eDNA) sampling method for aye-ayes from their feeding  
3 traces

4

5 **Author list**

6 Megan L. Aylward<sup>1</sup>, Alexis P. Sullivan<sup>2</sup>, George H. Perry<sup>2,3</sup>, Steig E. Johnson<sup>1</sup>, Edward E.

7 Louis Jr<sup>4</sup>

8 <sup>1</sup> Department of Anthropology and Archaeology, University of Calgary, Calgary, Alberta, T2N 1N4, Canada

9 <sup>2</sup> Department of Biology, Pennsylvania State University, State College, PA, 16802, USA

10 <sup>3</sup> Department of Anthropology, Pennsylvania State University, State College, PA, 16802, USA,

11 <sup>4</sup> Grewcock Center for Conservation and Research, Omaha's Henry Doorly Zoo and Aquarium, Omaha, NE,

12 USA

13 **Correspondence address**

14 Megan Aylward

15 Department of Anthropology and Archaeology, University of Calgary

16 2500 University Drive

17 Calgary, Alberta T2N 1N4

18 mlaylwar@ucalgary.ca

19

20

21

22

23

24

25

26

## 27 **Abstract**

28 Non-invasive sampling is an important development in population genetic monitoring of  
29 wild animals. Particularly, the collection of environmental DNA (eDNA) which can be  
30 collected without needing to encounter the target animal, facilitates the genetic analysis  
31 of cryptic and threatened species. One method that has been applied to these types of  
32 sample is target capture and enrichment which overcomes the issue of high proportions  
33 of exogenous (non-host) DNA from these lower quality samples. We tested whether  
34 target capture of mitochondrial DNA from sampled feeding traces of wild aye-eyes would  
35 yield mitochondrial DNA sequences for population genetic monitoring. We sampled  
36 gnawed wood from feeding traces where aye-eyes excavate wood-boring insect larvae  
37 from trees. We designed RNA probes complementary to the aye-aye's mitochondrial  
38 genome and used these to isolate aye-aye DNA from other non-target DNA in these  
39 samples. We successfully retrieved six near-complete mitochondrial genomes from two  
40 sites within the aye-aye's geographic range that had not been sampled previously. This  
41 method can likely be applied to alternative foraged remains to sample species other than  
42 aye-eyes. Our method demonstrates the application to next-generation molecular  
43 techniques to species of conservation concern.

44 **Key words:** Aye-aye, Endangered, Environmental DNA, Lemur, Madagascar, Mitogenome,  
45 Non-invasive sampling, Target capture

46

## 47 **Introduction**

48 Genetic sampling of wild populations can help us to address questions of demography,  
49 individual relatedness, population structure, and other important aspects of biodiversity  
50 that cannot be answered by behavioural monitoring alone (Allendorf, Hohenlohe, &

51 Luikart, 2010). However, the practicality of sampling wild animals can be limited by  
52 ethical implications due to the implicit risks of sedating animals to collect blood or tissue  
53 samples, especially for arboreal species, and for rare or elusive species (including  
54 nocturnal animals), by infrequent encounter rates. (Kohn & Wayne, 1997; Goossens,  
55 Chikhi, Utami, de Ruiter, & Bruford, 2000). Even when it is possible and safe to collect  
56 invasive samples from wild individuals, the number of samples that can be obtained with  
57 this approach may be fewer than analytically desirable (Sikes & Gannon, 2011). Under  
58 these conditions, non-invasive sampling is a valuable tool in advancing our  
59 understanding of wild populations.

60

61 Over the last two decades, advances in molecular biology have facilitated the use of non-  
62 invasive sampling for genetic analyses of wild populations (Morin, Wallis, Moore,  
63 Chakraborty, & Woodruff, 1993; Joost et al., 2007). Furthermore, traces of DNA left in the  
64 environment from biological material (eDNA) can be collected without even  
65 encountering target individuals. Source materials for non-invasive or eDNA sampling that  
66 have been used in wildlife monitoring and forensic studies include feathers, faeces, egg  
67 shells, hair, saliva, urine, and snail trails (Valiere & Taberlet, 2000; Inoue, Inoue-  
68 Murayama, Takenaka, & Nishida, 2007; Beja-Pereira, Oliveira, Alves, Schwartz, & Luikart,  
69 2009; Sastre, Francino, Sanchez, & Ramirez, 2009). Non-invasive and eDNA sampling are  
70 particularly valuable in research surrounding unhabituated populations, cryptic species,  
71 and those at risk of extinction (Goossens et al., 2000; Cushman, McKelvey, Hayden, &  
72 Schwartz, 2006; Kendall et al., 2009; Cleverger & Sawaya, 2010; Schubert et al., 2011;  
73 Morin, Kelly, & Waits, 2016; Orkin, Yang, Yang, Yu, & Jiang, 2016).

74

75 One species that could especially benefit from the advances in non-invasive genetic  
76 sampling is the aye-aye (*Daubentonia madagascariensis*), which is a rare and elusive  
77 Malagasy primate of major conservation concern (Sterling & McCreless, 2007; Schwitzer  
78 et al., 2013). The low population density, large home range size, cryptic nature, and  
79 nocturnal activity of aye-ayes make them particularly difficult to locate, and precise  
80 distributions and population densities are unclear (Sterling, 1994b). Challenges of  
81 monitoring aye-ayes and obtaining reliable population dynamics data are reflected in the  
82 volatility of aye-aye's conservation status designations over the last 70 years. In the  
83 1950's, the aye-aye was thought to be extinct (Sterling, 1994b). After aye-ayes were  
84 rediscovered in 1957, they were classified as Endangered; in 2008, their status was  
85 changed to Near Threatened before being reassessed as Endangered in 2012  
86 (Andriaholinirina et al., 2015). In addition to being listed as Endangered, aye-ayes are  
87 currently considered one of the world's top 25 most endangered primates  
88 (Randimbiharirina et al., 2017 in Schwitzer et al. 2016-2018). Few encounters, along  
89 with the aye-aye's solitary social organization and long maternal investment suggest low  
90 population densities. Low nuclear genomic diversity in aye-ayes reflects these  
91 assumptions; genomic analyses estimates of heterozygosity of 0.051%, and genetic  
92 diversity across synonymous sites of  $\pi = 0.073$ , are the lowest of any primate species  
93 studied to date (Perry, Melsted, et al., 2012; Perry, Reeves, et al., 2012). Therefore, despite  
94 the wide distribution of aye-ayes, there are likely few individuals, increasing the risk of  
95 local and global extinction (Schwitzer et al., 2013; Gross, 2017).

96

97 The IUCN's lemur survival strategy recognises the need for biological monitoring of aye-  
98 ayes to better assess population status and conserve genetic diversity within this lineage  
99 (Schwitzer et al., 2013). In addition to their elusive behaviour making aye-ayes difficult

100 to find and monitor, genetic sampling of individuals once they have been located is  
101 challenging; invasive collection of blood and tissue can only be achieved during  
102 immobilization, which is risky and must be conducted by trained and experienced  
103 personnel (Cunningham, Unwin, & Setchell, 2015). Therefore, to assess genetic diversity  
104 and identify priority populations for conservation a new, reliable means of non-invasive  
105 sampling in aye-eyes is required.

106

107 Reliable genotyping from non-invasively collected material holds much promise in  
108 sampling threatened species. Environmental DNA samples that are degraded due to  
109 exposure to both biotic and abiotic factors or contain high proportions of exogenous DNA  
110 can now provide reliable genetic markers (Beja-Pereira et al., 2009; Carpenter et al.,  
111 2013; Snyder-mackler et al., 2016). Techniques such as high-throughput sequencing  
112 technologies reduce sequencing errors and improve genotyping accuracy by providing  
113 greater depth of coverage across loci. One particularly promising approach is target  
114 capture, which provides a means of isolating endogenous DNA from the high proportions  
115 of exogenous DNA in non-invasive samples (Bi, Linderoth, Vanderpool, Good, & Nielsen,  
116 2013; Hawkins et al., 2015; Kirillova et al., 2015; Kistler et al., 2015; Mohandesan et al.,  
117 2017). Specifically, RNA probes which are complementary to particular regions or  
118 markers in the genome of the target organism are specially designed and synthesized  
119 (Gnirke et al., 2009). These probes hybridize to the endogenous DNA in the sample. After  
120 hybridization, the biotin coating of the probes allows streptavidin-coated magnetic beads  
121 to bind; the bound probes and hybridized endogenous DNA can then be isolated from the  
122 exogenous DNA by using a magnet (Gnirke et al., 2009; Giolai et al., 2016). These  
123 developments make monitoring and sampling of wild populations where individuals are  
124 difficult to locate increasingly feasible.

125

126 For primates, the application of target capture from low quality samples has largely been  
127 applied to ancient DNA studies, but Perry et al., (2010) and Snyder-Mackler et al., (2016)  
128 have presented effective approaches for sampling endogenous DNA from faeces in extant  
129 primate species. Recently, Chiou & Bergey , (2018) demonstrated a different method that  
130 isolates endogenous DNA from primate faeces by targeting the higher CpG-methylation  
131 density of vertebrate taxa relative to the exogenous bacterial and plant DNA in faeces.  
132 Although faecal collection is a popular source of non-invasive sampling of primates (Oka  
133 & Takenaka, 2001; Quéméré, Crouau-Roy, Rabarivola, Louis, & Chikhi, 2010; Chancellor  
134 et al., 2011), it is unlikely to be a feasible method of sampling for aye-ayes. Factors such  
135 as aye-aye's nocturnal behaviour, the height that they travel in the canopy, and their large  
136 nightly travel distances mean that defecation is difficult to observe and locating and  
137 collecting faecal material is problematic (Randimbiharirina et al., 2017); accordingly,  
138 at two sites where aye-ayes have been monitored by Madagascar Biodiversity  
139 Partnership since 2010, aye-aye faecal samples have only been collected through routine  
140 immobilizations.. Therefore, to gain information on the genetics of aye-aye populations  
141 to meet the IUCN aims, in this paper, we explore the possibility of sampling eDNA from  
142 aye-ayes (Schwitzer et al., 2013).

143

144 One potential source of eDNA in aye-ayes is from their distinct feeding traces left on trees.  
145 These traces are associated with their adaptations for extracting the larvae of wood-  
146 boring insects from tree trunks and branches, after identifying suitable foraging locations  
147 via a process of sniffing, lightly tapping, and listening (Sterling, 1994a; Erickson, 1995).  
148 Aye-ayes gnaw into selected areas of trees with their elongated and continuously growing  
149 incisors and extract larvae using their thin flexible third digit (Sterling, 1994a). During

150 this foraging process, the buccal cavity of the aye-aye comes into contact with the wood  
151 (Sterling, 1994a; Erickson, 1995; Sterling & McCreless, 2007; arkive.org, 2017). Thus,  
152 trace amounts of aye-aye biological material in the form of epithelial cells of the buccal  
153 mucosa or from saliva may be deposited and accessible as an eDNA source.

154

155 We investigated the application of target capture and enrichment to obtain aye-aye DNA  
156 from aye-aye feeding traces. We aimed to determine whether this method is a feasible  
157 alternative to invasive sampling. If eDNA samples provide a means of remotely sampling  
158 wild aye-aye populations, we predict that (1) target enrichment is an effective method of  
159 obtaining aye-aye DNA from the exogenous DNA in feeding traces, and (2) we will be able  
160 to obtain full mitochondrial genomes (hereafter 'mitogenomes') for population genomic  
161 analysis.

162

## 163 **Methods**

### 164 **Sampling sites and techniques**

165 Initial training for researchers and local technicians on accurate identification of aye-aye  
166 feeding traces and the sample collection method was conducted through the Kianjavato  
167 Ahmanson Field Station (KAFS) located in the Kianjavato commune of the Vatovavy-  
168 Fitovinany region in southeast Madagascar during June 2014. KAFS is a long-term field  
169 site of the Madagascar Biodiversity Partnership (MBP). Individual aye-ayes present in the  
170 region have been fitted with ATS (Applied Telemetry Systems®) VHS radio-collars for  
171 behavioural monitoring, which afforded the opportunity to view known feeding sites in  
172 an area of bamboo to become familiar with density and frequency of feeding traces, their  
173 characteristics and to practice the collection technique (see below).

174

175 To then test the sampling method on unmonitored populations, we selected two study  
176 sites near to the limits of the aye-aye's geographic distribution, where aye-ayes have been  
177 sighted but not sampled: Manombo Special Reserve in the Atsimo-Atsinanana region in  
178 southeastern Madagascar, operated by Madagascar National Parks and at that time  
179 supported by Durrell Wildlife Conservation Trust, and the Tsingy de Beanka, Ambinda in  
180 the Melaky region in west-central Madagascar and supported by Biodiversity  
181 Conservation Madagascar (Figure 1). Between July and December 2014, MA surveyed the  
182 forest at each site with the assistance of three local technicians. Prior to sampling, local  
183 technicians cleared undergrowth from existing trail systems in the forest to use as  
184 transects. During daylight hours, these transects were walked at a slow pace of  
185 approximately 1 km/hr to look for feeding traces and searched areas on either side of the  
186 transect at 200 m intervals. Traces were observed in both live and dead plants where  
187 characteristic holes gnawed by aye-aye were identified. These were confirmed by the  
188 distinct shape of feeding traces and typically presence of teeth marks (Figure 2). The  
189 research permit (N° 162/14/MEF/SG/DGF/DCB.SAP/SCB) for sample collection was  
190 obtained from the Ministere de l'environnement, des eaux et forets et du tourisme, in  
191 Madagascar.

192

193 To collect samples, we selected areas around the edge of the trace where the buccal cavity  
194 and teeth of the animal were likely to have come into contact with the tree (Figure 2). MA  
195 took 3-6 samples of tree material per trace; each sample was approximately 2 g<sup>-1</sup> of wood  
196 shavings. MA collected samples using a scalpel to cut wood from the site directly into a  
197 1.5 mL Eppendorf® tube containing 500 µL RNAlater. To reduce the chance of  
198 contamination, MA wore latex gloves and used a new, sterile scalpel blade for each  
199 sample. At Manombo, we walked 9.5 km of transects over a 6 km<sup>2</sup> area. At Beanka, we



200 surveyed 10.8 km of transects covering a total 9 km<sup>2</sup> area. MA sampled a total of 59 traces  
201 across the two sites (Manombo: n=27; Beanka: n=32). We stored samples at ambient  
202 temperature until they could be transferred to 4 °C for storage in Antananarivo,  
203 Madagascar. MBP exported samples from Madagascar (Export Permit Number 233N-  
204 EV07/MG16) and stored the samples at Omaha's Henry Doorly Zoo and Aquarium at 4 °C  
205 for four months prior to processing.

206

### 207 **DNA extraction, library preparation, capture, and sequencing**

208 After samples were removed from storage, we extracted DNA from all samples. We  
209 vortexed each sample for 30 seconds in PBS to wash aye-aye DNA from the surface of the  
210 wood and then removed pieces of wood using sterile forceps. We added 500 µL of PBS  
211 solution to the sample and centrifuged at 10,000 g to pellet the cellular DNA and then  
212 carefully removed the supernatant so as not to disturb the precipitate. We performed all  
213 DNA extractions on the precipitate using EZNA® blood DNA mini kit following the buccal  
214 swab protocol with the following modifications: we lysed samples overnight, and we  
215 eluted DNA in 50 µL elution buffer, incubated for 20 minutes and then re-eluted with the  
216 same eluate. Preliminary tests to confirm the presence of aye-aye DNA were conducted  
217 using a microsatellite marker for loci AYE33 of approximately 279 bp, with the following  
218 primer pair: forward 5'-3' GTCTGCTACTCCTTAGGTGCTG and reverse 5'-  
219 TGGCTCAGGGCAATACAAT-3'. We amplified the extracted DNA in a 15 µL reaction  
220 containing 0.25 µL of each 10 uM primer, 7.5 µL buffer containing 1.5 mM MgCl<sub>2</sub> (1X) and  
221 0.2 mM of each dNTP (1X), 0.12 µL KAPA3G plant DNA polymerase, 4.9 µL H<sub>2</sub>O, and 2 µL  
222 DNA sample. Cycling parameters began with an initial enzyme activation temperature of  
223 95 °C for 3 min, followed by 32 cycles of: denaturation at 98°C for 20 s, primer annealing  
224 at 58 °C for 15 s and elongation at 72 °C for 30 s, then one cycle of final elongation at 72

225 °C for 1 min. We visually confirmed the presence of the expected 279 bp PCR product by  
226 gel electrophoresis with 5 µL of PCR product and using 2 µL of a 1 kb ladder.

227

228 Extracted DNA was transported to Pennsylvania State University, University Park, PA for  
229 library preparation and DNA capture. We quantified the DNA concentration and fragment  
230 size of ten samples using a bioanalyzer (Agilent Technologies, Santa Clara, CA) at the Huck  
231 Institute of the Life Sciences (HILS), University Park, PA, genomics core facility. We  
232 selected a subset of 22 samples that were estimated to have been between 14 h-6 months  
233 old at the time of collection based on observations during surveys and discolouration of  
234 wood. We prepared DNA sequencing libraries from each of these samples using the  
235 Illumina TruSeq nano® kit. The TruSeq nano® library preparation protocol recommends  
236 200 ng<sup>-1</sup> of input DNA. Due to the typically low quantities of DNA extracted from each  
237 individual wood sample (<300 pg/uL), we combined DNA extracted from multiple  
238 samples taken from the same trace into one sample per feeding trace to increase total  
239 amounts of library preparation input DNA per sample to approximately 5-42 ng<sup>-1</sup> DNA  
240 (based on bioanalyzer readings for a subset of samples). To account for the low input DNA  
241 quantities, we adapted the protocol to use half quantities of all reagents and volumes. We  
242 sheared each DNA sample to a mean size of 500 bp with the Covaris-M220® using the  
243 following settings: 34 seconds, peak incident of 50, duty factor of 20% and 200 cycles per  
244 burst. For library preparation wash steps, 180 µL ethanol was used and an additional  
245 initial wash step was included to remove residual salts from eluting extracted DNA. We  
246 used the Bioanalyzer (Agilent Technologies, Santa Clara, CA) to quantify the final library  
247 and confirm a mean library size of 750 bp fragments, as expected for 550 bp libraries  
248 once the sequencing adapters and unique barcodes are attached to the 550bp DNA  
249 fragments.

250

251 As a preliminary test to check for the presence of aye-aye DNA in these libraries, we  
252 shotgun sequenced ten DNA libraries. Libraries were included as part of a larger  
253 multiplexed sequencing pool (Table A1) and sequenced using the Illumina NextSeq® 500  
254 2x150 pair end chemistry at UCLA Clinical Microarray Core Facility. Samples were  
255 demultiplexed at the sequencing facility.

256

257 RNA probes for capture of the aye-aye mitogenome were designed through MyBaits® at  
258 Arbor Biosciences™. Baits were designed based on the aye-aye reference mitochondrial  
259 DNA genome sequence (GenBank® accession NC\_010299.1), bait length was 80 bp at 4x  
260 tiling and these are available as a predesigned MyBaits® Mito panel. We conducted  
261 captures as per MyBaits® manual v.3 and a single round of captures was conducted on 19  
262 of the eDNA (foraging remains) samples. Post capture products were quantified using  
263 Bioanalyzer (Agilent Technologies, Santa Clara, CA) at the genomics core facility at the  
264 HILS and pooled for sequencing (Table A2). These capture products were sequenced as  
265 one pool of 17 samples and two of the samples (BTS38 and BTS108) were included as  
266 part of a different sequencing pool. The final mitochondrial capture pool of 17 Mito Bait  
267 captured DNA libraries was sequenced on one lane of the NextSeq 500 mid-output 2x150  
268 bp pair end chemistry UCLA Clinical Microarray Core Facility. Samples were  
269 demultiplexed and barcodes removed at the sequencing facility.

270

## 271 **Data analysis**

272 All computational analyses were conducted on servers provided by WestGrid  
273 ([www.westgrid.ca](http://www.westgrid.ca)) at Compute Canada ([www.computecanada.ca](http://www.computecanada.ca)). Raw reads were  
274 submitted to the NCBI SRA project under the accession PRJNA434884. The following

275 processing and alignment pipeline was used for the shotgun and captured DNA  
276 sequencing pools. We assessed sequence read quality using Fast-QC (Andrews, 2007) and  
277 filtered reads based on minimum read length of 120bp and mean quality of 20 using  
278 PRINSEQ-lite (Schmieder & Edwards, 2011). We removed any potential human  
279 contaminant reads using the bbsplit package of bbmap (Bushnell, 2016); sequencing  
280 reads were aligned to both the aye-aye and human genome and any reads which matched  
281 better to the human genome than the aye-aye genome were removed from the dataset.  
282 Paired reads were aligned to the aye-aye reference genome GCA\_000241425.1 (Perry,  
283 Reeves, et al., 2012), using the bwa-mem alignment algorithm (Li & Durbin, 2009; Li,  
284 2013). We used the MarkDuplicates tool in PicardToolsv.1106 (Broad Institute, 2017) to  
285 remove sequencing and PCR duplicates, and reads flagged as clipped were filtered from  
286 the dataset. We generated consensus sequences for the eDNA samples with near-  
287 complete mitogenomes using samtoolsv.1.3, bcftoolsv.1.3 and vcfUtilsv.1.3 (Li et al.,  
288 2009; Danecek et al., 2011; Li, 2011). To confirm the base calls in these consensus  
289 sequences, we compared the samtoolsv.1.3 generated sequences to those generated  
290 using IGV (Robinson et al., 2012) to ensure the same nucleotide bases were found by each  
291 software program.

292

293 We compared the mitogenome sequences from our eDNA samples with the GenBank®  
294 aye-aye mitogenome data to confirm that they were novel (Perry et al., 2013; Kistler et  
295 al., 2015). We called variants using GATK (McKenna et al., 2010), and used haplotype  
296 caller to generate individual gVCFs and then the joint variant caller. To filter for biallelic  
297 SNPs only, we used VCFtoolsv.1.12 and set maximum and minimum alleles to two.

298

299 We used PGDSpiderv2.3 to convert SNP variant calls from vcf to ped format (Lischer &  
300 Excoffier, 2012). We used the --cluster and --matrix commands in Plinkv.1.7 (Purcell et  
301 al., 2007) to calculate the pairwise proportion (identity by state, IBS) of shared alleles at  
302 SNP loci among all complete mitogenome sequences. For the Plink analysis, we used the  
303 complete mitochondrial genomes excluding the hyper-variable region given the potential  
304 for homoplasmy in this region and the possibility for multiple mutations per site (Ballard  
305 & Whitlock, 2004; Gonder, Mortensen, Reed, De Sousa, & Tishkoff, 2007).

306

## 307 **Results**

### 308 **Pre-capture processing**

309 After library preparation, shotgun sequencing of libraries from eDNA samples did not  
310 yield sufficient mitochondrial DNA for mitogenome analysis. Of the 10 libraries that were  
311 shotgun sequenced, seven yielded fewer than 10 reads aligning to the aye-aye  
312 mitochondrial genome; one sample, with the highest number of mitochondrial reads, was  
313 MSR58 with 189 unique reads (0.000274%) (Table 1).

314

### 315 **Target capture DNA sequencing**

316 Target captures of the mitogenome increased the proportion of on-target mitochondrial  
317 DNA reads by several orders of magnitude compared to reads yielded from shotgun  
318 sequencing without capture (Table 1). For samples for which it was possible to calculate  
319 the fold enrichment (i.e., the samples that were both shotgun sequenced and sequenced  
320 following DNA capture), the percent of unique on-target reads increased by over 100  
321 times. For captured samples, the percent of on-target reads ranged from 0.009% to 27.5%  
322 of the total reads, whereas the percent unique on-target reads ranged from 0.001% to  
323 0.05% (Table 2).

324

325 We recovered near-complete mitogenomes for six of the 19 captured samples (31.6%).  
326 The depth and breadth of coverage varied between samples (Table 1). For these six  
327 mitogenomes, the mean depth of coverage was 16x (range 8-25x). For the 13 samples  
328 with less than 90% coverage, the percent of the genome covered ranged from 10-71%  
329 (mean 32.58%) with a mean depth of 1.7 (+/-0.3-2.8). Five of these 13 samples had a  
330 breadth of coverage between 45-70% and were all identical at SNP loci to the samples  
331 with greater breadth of coverage. We only included samples with coverage greater than  
332 90% in downstream analysis.

333

### 334 **Mitogenome analysis**

335 Based on multiple sequence alignment of these seven near-complete mitogenomes, we  
336 identified one unique mitogenome sequence from Manombo Special Reserve and two  
337 unique mitogenomes from Tsingy de Beanka. Alignment with previously published  
338 GenBank® sequences that the mitogenome sequences obtained from the eDNA samples  
339 were unique to all previously published aye-aye mitogenomes. For the GenBank  
340 sequences sample locations from northern Madagascar, we follow the population names  
341 in Perry et al., (2013); North, East, and West (Figure 1). When we compared SNP loci  
342 among samples, all mitogenomes clustered into distinct populations according to their  
343 collection location (Figure 3). Pairwise comparison of genotypes at polymorphic loci  
344 indicate that there are four distinct populations (Figure 3). The Tsingy de Beanka  
345 population showed moderate differentiation from the other populations (Figure 3).  
346 There was also a split between the East population and Manombo in the southeast, while  
347 the North population shared the fewest alleles with all other populations.

348

## 349 **Discussion**

350 We tested whether sampling of aye-aye feeding traces is a feasible method of non-  
351 invasive sampling of this species. Our first prediction, that target capture would provide  
352 a means of sampling aye-aye DNA from these feeding traces, was supported by the  
353 increased amount of endogenous DNA obtained from target capture compared to shotgun  
354 sequencing. The number of on-target reads from the shotgun sequencing was not at  
355 sufficient coverage across the mitogenome to identify polymorphic sites and genotype  
356 individuals. The high level of enrichment from captured libraries compared to shotgun  
357 sequencing indicates the efficacy of a target capture approach (Gnirke et al., 2009). Our  
358 second prediction, that mitogenomes could be obtained from these samples and used for  
359 population genomic analysis, was also supported. We were able to obtain near complete  
360 mitogenomes for 31.6% of the processed samples. Previous studies that have sampled  
361 eDNA from foraged material have typically only retrieved partial D-loop fragments rather  
362 than whole mitogenomes (Nichols, Konigsson, Danell, & Spong, 2012; Caniglia, Fabbri,  
363 Mastrogiuseppe, & Randi, 2013; Wheat, Allen, Miller, Wilmers, & Levi, 2016). While  
364 partial fragments can be useful in metabarcoding studies for species detection, whole  
365 mitogenomes provide greater phylogenetic resolution and reduce the likelihood of  
366 including nuclear copies of mitochondrial DNA(numts) (Johnsen, Kearns, Omland, &  
367 Anmarkrud, 2017).

368

## 369 **Future directions for methodological improvements for sampling aye-aye eDNA**

370 The method developed here is a valuable tool to extend sampling of unmonitored aye-aye  
371 populations. Yet, improved efficacy of the method to increase amount of aye-aye DNA  
372 obtained and therefore reduce the cost per sample could make it a more attractive  
373 application for conservation monitoring (Ekblom & Galindo, 2010). Low proportions of

374 on-target, unique sequence reads recovered are common when working with  
375 environmental samples (Ávila-Arcos et al., 2015; Nielsen et al., 2017) and adequate  
376 sampling effort is required to account for this issue. A mode of three different samples  
377 was taken per feeding trace, and it would be feasible to double this number. Therefore,  
378 we recommend more intensive sampling of each feeding trace to allow for multiple  
379 library preparations per trace, whilst maintaining sufficient amounts of input DNA for  
380 TruSeq nano® library preparation. Multiple library preparations for each trace prior to  
381 capture may increase the number of unique DNA fragments within the samples and  
382 reduce PCR bias. The proportion of unique reads aligning to the target region was  
383 relatively low (0.4-12 %). To better assess the number of PCR cycles to run post-capture  
384 to achieve sufficient concentrations for sequencing, qPCR quantification may be valuable  
385 to ensure reduced PCR duplication, therefore improved sequencing efficacy and  
386 ultimately increased cost effectiveness (Enk, Rouillard, & Poinar, 2013).

387

### 388 **Application towards addressing the IUCN's objectives for aye-ayes**

389 We demonstrated a novel method that can be applied across the species range for  
390 population genomic monitoring. This method helps to meet objective seven of the IUCN's  
391 lemur survival plan set out by Schwitzer et al., (2013:page32) which is "Fill knowledge  
392 gaps in population ecology and biodiversity of lemurs, and increase training of Malagasy  
393 scientists". Our method provides a means of genomic biodiversity monitoring using  
394 cutting edge molecular techniques. Application of this method allowed us to successfully  
395 recover six aye-aye mitogenomes from sites in the south-east and west of Madagascar  
396 where aye-ayes have not been sampled previously. The wide distribution of aye-ayes  
397 across Madagascar means sampling across environments is key in effective population  
398 monitoring at local and national scales (Schwitzer et al., 2013). The different habitat types



399 that aye-ayes are distributed in range from rainforests in southeast Madagascar, a habitat  
400 with relatively humidity and rainfall, to the dry deciduous forest in the west of  
401 Madagascar, with less dense canopy cover and likely greater exposure to direct UV  
402 radiation (Rakoto-Joseph, Garde, David, Adelard, & Randriamanantany, 2009;  
403 Andriamisedra, Aylward, Johnson, Louis, & Raharivololona, 2015). Our recovery of  
404 mitogenomes from distinct environments indicates these abiotic factors do not  
405 necessarily preclude the ability to sample eDNA from these areas and this method can  
406 likely be applied to sample in habitat across the species' geographic distribution (Sterling  
407 & McCreless, 2007). The mobility of this sampling technique along with little training  
408 required for sample collection provides a means of surveying large areas of aye-aye  
409 habitat in a relatively short time frame. The ease of sampling and ability to survey large  
410 areas provide the opportunity for sampling multiple individuals across a population and  
411 accessing mitogenome diversity within forest fragments.

412

413 Our preliminary analysis revealed high differentiation between the North population and  
414 all other sampled locations, consistent with the whole genome analysis of Perry et al.,  
415 (2013) which showed the North population to be the most genetically distinct of three  
416 regional populations. Given that our relatively sparse sampling strategy revealed two  
417 genetically distinct populations, we encourage the application of this method and the use  
418 of the predesigned aye-aye Mito panel from MyBaits® to sample additional areas of aye-  
419 aye habitat.

420

### 421 **Applications to other species**

422 The aye-aye is arguably one of the most elusive lemur species in Madagascar (Schwitzer  
423 et al., 2013), and other endangered species that are difficult to locate could also benefit

424 from eDNA sampling. The Critically Endangered *Prolemur simus* leave traces on bamboo  
425 plants which are similar to those of sympatric bamboo lemurs that feed on the same plant  
426 species (Tan, 1999; Ravaloharimanitra et al., 2011). Application of the method presented  
427 here could confirm the presence of these threatened species which are typically sparsely  
428 distributed and difficult to locate in the wild (Wright et al., 2008; Ravaloharimanitra et  
429 al., 2011; Frasier et al., 2015). Similarly, Critically Endangered *Eulemur cinereiceps* could  
430 be sampled via traces on gnawed fronds of *Cecropia peltata* trees (Ralainasolo,  
431 Ratsimbazafy, & Stevens, 2006). Although the method developed here is novel, sampling  
432 of saliva from foraged material has been used previously as a means of non-invasive  
433 sampling; gorillas and golden monkeys discard plant material (Smiley et al., 2010),  
434 ungulates leave saliva traces on foraged twigs (Nichols et al., 2012), and large carnivores  
435 leave saliva on prey (Blejwas, Williams, Shin, Dale, & Jaeger, 2006; Sundqvist, Ellegren, &  
436 Vila, 2008; Glen et al., 2010; Caniglia et al., 2013; Wheat et al., 2016). This method of target  
437 capture could be applied to these sources to sample mitogenome eDNA from a range of  
438 species.

439

#### 440 **NGS molecular techniques and conservation**

441 This method provides an example of the utility of next-generation molecular techniques  
442 for non-invasive samples towards sampling wild populations in a species that requires  
443 conservation attention. The application of target capture and enrichment has been used  
444 previously in non-human primates to sample faecal and ancient DNA (Perry et al., 2010;  
445 Kistler et al., 2015; Snyder-mackler et al., 2016). We demonstrated the application of  
446 similar molecular techniques to sample from an Endangered lemur species, revealing  
447 broad-scale population structure across the aye-aye's geographic range. One area of  
448 discussion that arises from reviews of the application of next-generation molecular

449 techniques to conservation is often the necessity of these novel techniques over more  
450 conventional approaches, given the increased cost and amount of data generated  
451 (Allendorf et al., 2010; McMahon, Teeling, & Höglund, 2014; Shafer et al., 2015). Here we  
452 present both a unique challenge and solution to sampling a low-density, elusive, and  
453 Endangered species. These methodological developments are valuable tools that have  
454 enabled us to sample and monitor a cryptic species that otherwise has limited genomic  
455 sampling potential. As the field of conservation genomics expands methods such as the  
456 one presented here can be applied to achieve direct conservation action.

457

458

#### 459 **Author contributions**

460 EL, GP, MA and SJ conceived idea and designed methodology; MA collected samples; MA  
461 and AS conducted laboratory work. All authors contributed critically to drafts and gave  
462 final approval for publication.

463

464

#### 465 **Data accessibility**

466 Raw sequence reads are available from GenBank SRA accession SRP133213

## Figures and tables

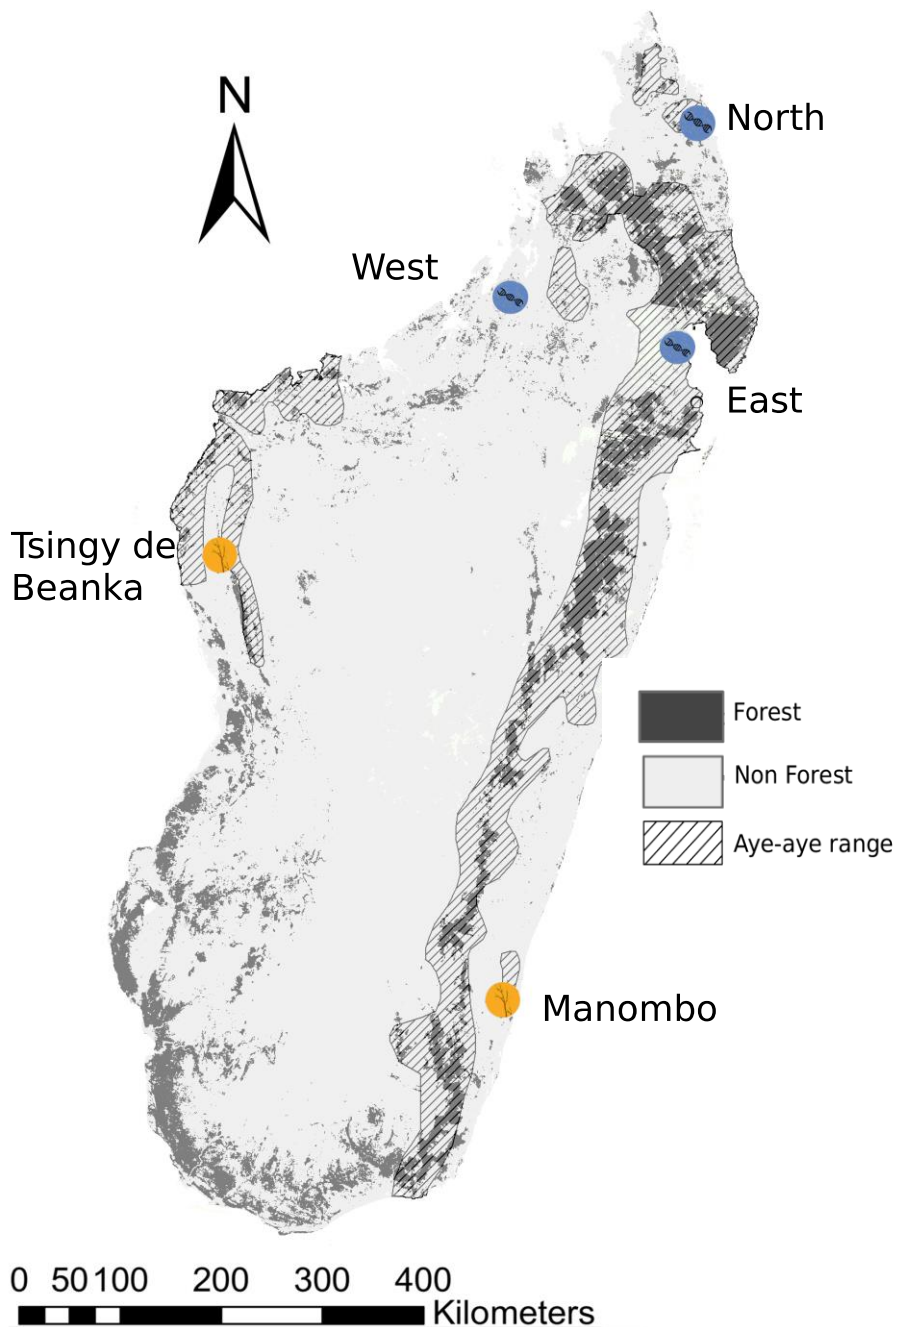

**Figure 1.** A map of the island of Madagascar showing sample locations targeted in this study. The orange circles highlight the two locations surveyed for aye-aye feeding traces and eDNA samples were collected. The blue circles indicate the locations that were sampled in Perry et al. 2013, from which the mitogenome sequences from Kistler et al. 2015 were sampled.

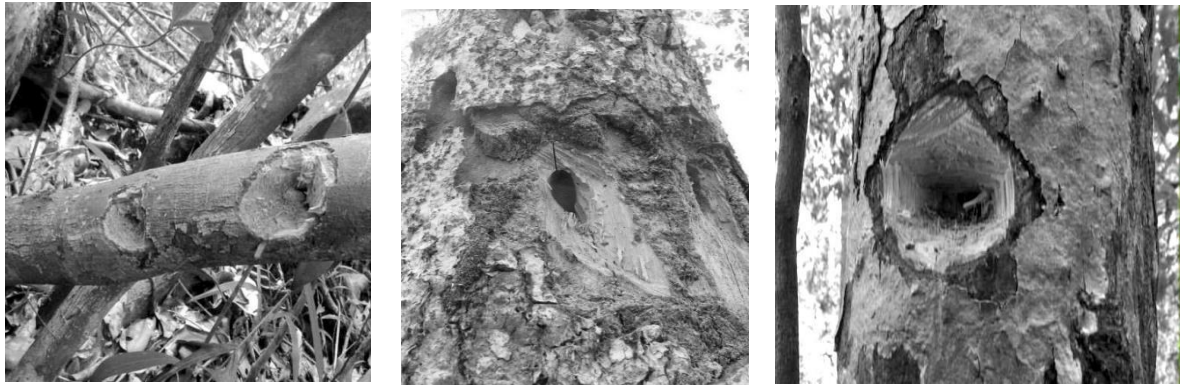

**Figure 2. Aye-aye feeding traces. These images indicate the typical aye-aye feeding traces showing distinct shapes and teeth marks. These traces centre on a hole where the aye-aye has used its specialized extractive foraging strategy to access wood boring insect larvae. We sampled pieces of wood around the edge of the trace where the buccal cavity of the aye-aye comes into contact with the tree.**

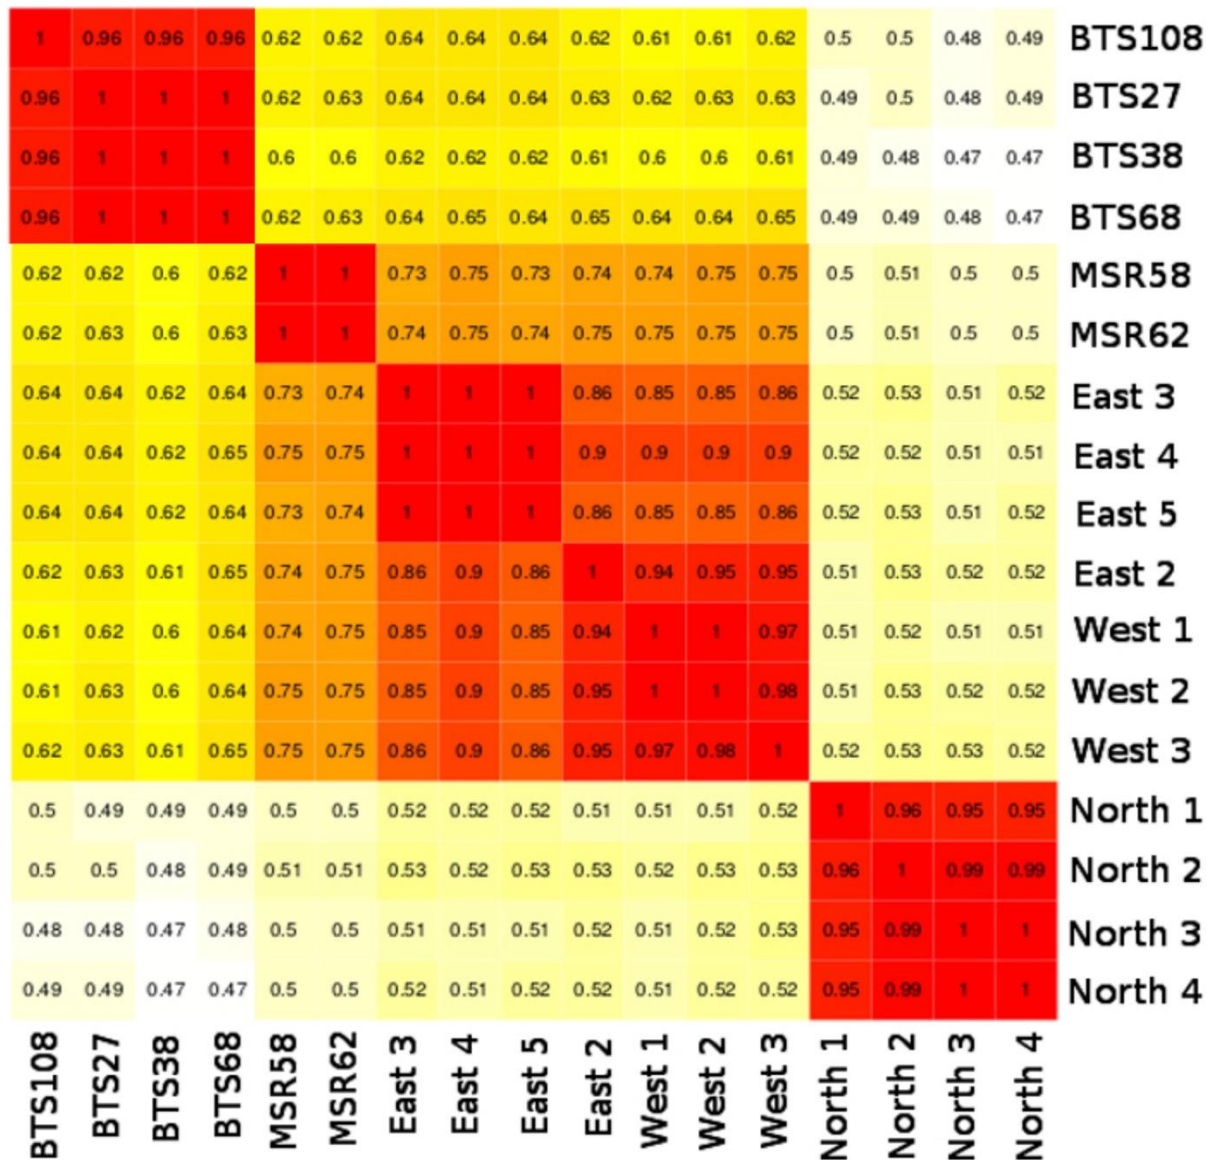

Figure 3. Identity by state matrix on the left, which shows the proportion of pairwise shared alleles at each SNP site for mitogenomes excluding the d-loop region. We compare eDNA samples from feeding traces with previously published mitogenome sequences (Kistler et al., 2015). Warmer colours indicate greater proportions of shared alleles at these loci.



**Table 1. The fold increase in percent of unique on-target reads aligning to the aye-aye mitochondrial genome target MitoBait captures compared to shotgun sequencing of the DNA libraries. Data show for the ten libraries that were shotgun sequenced prior to capture.**

| Sample ID | Number of on-target reads | Unique on-target reads, shotgun sequencing (%) | Unique on-target reads, from captured DNA libraries (%) | Fold enrichment |
|-----------|---------------------------|------------------------------------------------|---------------------------------------------------------|-----------------|
| MSR01     | 0                         | 0.000000                                       | 0.0027                                                  | -               |
| MSR44     | 8                         | 0.000038                                       | 0.0538                                                  | 1416            |
| MSR46     | 0                         | 0.000000                                       | 0.0019                                                  | -               |
| MSR50     | 31                        | 0.000063                                       | 0.0248                                                  | 394             |
| MSR58     | 189                       | 0.000274                                       | 0.0408                                                  | 149             |
| BTS04     | 0                         | 0.000000                                       | 0.0051                                                  | -               |
| BTS38     | 6                         | 0.000103                                       | 0.0267                                                  | 259             |
| BTS60     | 0                         | 0.000000                                       | 0.0005                                                  | -               |
| BTS108    | 24                        | 0.000124                                       | 0.0139                                                  | 112             |
| BTS112    | 0                         | 0.000000                                       | 0.0056                                                  | -               |

**Table 2. Sequencing summary statistics showing number of reads and depth and breadth of coverages for MitoBait captures. Grey shading indicates samples with over 90% breadth of coverage that were used for comparisons with published mitogenomes.**

| Sample site      | Sample ID | Reads on-target (%) | Unique reads on-target (%) | Mean read depth (SD) | Mean % coverage |
|------------------|-----------|---------------------|----------------------------|----------------------|-----------------|
| Tsingy de Beanka | BTS04     | 0.06                | 0.0015                     | 1.56 (0.9)           | 59.3            |
| Tsingy de Beanka | BTS27     | 0.38                | 0.0063                     | 13.0 (5.3)           | 99.4            |
| Tsingy de Beanka | BTS38     | 0.22                | 0.027                      | 23.3 (5.9)           | 98.0            |
| Tsingy de Beanka | BTS60     | 0.02                | 0.0005                     | 1.8 (2.2)            | 45.6            |
| Tsingy de Beanka | BTS68     | 4.3                 | 0.0088                     | 8.5 (6.0)            | 98.9            |
| Tsingy de Beanka | BTS102    | 0.26                | 0.0013                     | 1.8 (1.4)            | 27.3            |
| Tsingy de Beanka | BTS105    | 0.5                 | 0.0005                     | 1.7 (1.2)            | 22.1            |
| Tsingy de Beanka | BTS108    | 0.4                 | 0.014                      | 15.1 (5.6)           | 99.5            |
| Tsingy de Beanka | BTS112    | 0.46                | 0.0056                     | 1.3 (0.6)            | 10.9            |
| Manombo Special  | MSR01     | 0.05                | 0.0027                     | 2.0 (1.4)            | 65.9            |
| Manombo Special  | MSR23     | 0.04                | 0.039                      | 1.2 (0.4)            | 12.3            |
| Manombo Special  | MSR37     | 0.16                | 0.0002                     | 1.1 (0.3)            | 11.1            |
| Manombo Special  | MSR39     | 27.54               | 0.0024                     | 5.0 (11.83)          | 45.5            |
| Manombo Special  | MSR44     | 22.25               | 0.05                       | 1.5 (1.2)            | 21.9            |
| Manombo Special  | MSR46     | 4.11                | 0.0019                     | 1.3 (0.5)            | 10.8            |
| Manombo Special  | MSR50     | 12.19               | 0.025                      | 2.5 (2.07)           | 70.9            |
| Manombo Special  | MSR56     | 0.024               | 0.0001                     | 1.3 (0.6)            | 15.0            |
| Manombo Special  | MSR58     | 2.71                | 0.04                       | 12.4 (7.2)           | 98.5            |
| Manombo Special  | MSR62     | 2.20                | 0.015                      | 25.1 (8.8)           | 99.8            |



468 **References**  
469

- 470 Allendorf, F. W., Hohenlohe, P. A., & Luikart, G. (2010). Genomics and the future of  
471 conservation genetics. *Nature Reviews Genetics*, *11*(10), 697–709.  
472 doi:10.1038/nrg2844
- 473 Andriaholinirina, N., Baden, A., Blanco, M., Chikhi, L., Cooke, A., Davies, N., ... Zaramody.  
474 (2015). *Daubentonia madagascariensis*. *The IUCN Red List of Threatened Species*,  
475 8235. doi:10.2305/IUCN.UK.2014-
- 476 Andriamisedra, R., Aylward, M., Johnson, S. E., Louis, E. E., & Raharivololona, B. M.  
477 (2015). Détermination de quelques aspects de l'écologie de *Daubentonia*  
478 *madagascariensis* (Gmelin, 1788) dans deux forêts... *Lemur News*, *19*.  
479 arhive.org. (2017). Aye-aye feeding on grubs using elongated finger. BBC Motion  
480 Gallery.
- 481 Ávila-Arcos, M. C., Sandoval-Velasco, M., Schroeder, H., Carpenter, M. L., Malaspinas, A. S.,  
482 Wales, N., ... Gilbert, M. T. P. (2015). Comparative performance of two whole-  
483 genome capture methodologies on ancient DNA Illumina libraries. *Methods in*  
484 *Ecology and Evolution*, *6*(6), 725–734. doi:10.1111/2041-210X.12353
- 485 Ballard, J. W. O., & Whitlock, M. C. (2004). The incomplete natural history of  
486 mitochondria. *Molecular Ecology*, *13*(4), 729–744. doi:10.1046/j.1365-  
487 294X.2003.02063.x
- 488 Beja-Pereira, A., Oliveira, R., Alves, P. C., Schwartz, M. K., & Luikart, G. (2009). Advancing  
489 ecological understandings through technological transformations in noninvasive  
490 genetics. *Molecular Ecology Resources*, *9*(5), 1279–301. doi:10.1111/j.1755-  
491 0998.2009.02699.x
- 492 Bi, K. E., Linderoth, T., Vanderpool, D. A. N., Good, J. M., & Nielsen, R. (2013). Unlocking  
493 the vault : next-generation museum population genomics. *Molecular Ecology*, *22*,  
494 6018–6032. doi:10.1111/mec.12516
- 495 Blejwas, K. M., Williams, C. L., Shin, G. T., Dale, R., & Jaeger, M. M. (2006). Salivary DNA  
496 Evidence Convicts Breeding Male Coyotes of Killing Sheep. *Journal of Wildlife*  
497 *Management*, *70*(4), 1087–1093.
- 498 Bushnell, B. (2016). BBMap short read aligner. *University of California, Berkeley,*  
499 *California*. URL [Http://Sourceforge. Net/Projects/Bbmap](http://Sourceforge.Net/Projects/Bbmap).
- 500 Caniglia, R., Fabbri, E., Mastrogiuseppe, L., & Randi, E. (2013). Who is who ?  
501 Identification of livestock predators using forensic genetic approaches. *Forensic*  
502 *Science International : Genetics*, *7*, 397–404.
- 503 Carpenter, M. L., Buenrostro, J. D., Valdiosera, C., Schroeder, H., Allentoft, M. E., Sikora,  
504 M., ... Gilbert, M. T. P. (2013). Pulling out the 1 %: Whole-Genome Capture for the  
505 Targeted Enrichment of Ancient DNA Sequencing Libraries. *The American Journal*  
506 *of Human Genetics*, *93*, 852–864. doi:10.1016/j.ajhg.2013.10.002
- 507 Chancellor, R. L., Satkoski, J., George, D., Olupot, W., Lichti, N., Smith, D. G., & Waser, P. M.  
508 (2011). Do Dispersing Monkeys Follow Kin? Evidence from Gray-cheeked  
509 Mangabeys (*Lophocebus albigena*). *International Journal of Primatology*, *32*(2),  
510 474–490. doi:10.1007/s10764-010-9483-6
- 511 Chiou, K. L., & Bergey, C. M. (2018). Methylation-based enrichment facilitates low-cost,  
512 noninvasive genomic scale sequencing of populations from feces. *Scientific*  
513 *Reports*, *8*(1). doi:10.1038/s41598-018-20427-9

- 514 Clevenger, A. P., & Sawaya, M. A. (2010). Piloting a Non-Invasive Genetic Sampling  
515 Method for Evaluating Population-Level Benefits of Wildlife Crossing Structures.  
516 *Ecology and Society*, 15(1).
- 517 Cunningham, E. P., Unwin, S., & Setchell, J. M. (2015). Darting Primates in the Field: A  
518 Review of Reporting Trends and a Survey of Practices and Their Effect on the  
519 Primates Involved. *International Journal of Primatology*, 36(5), 911–932.  
520 doi:10.1007/s10764-015-9862-0
- 521 Cushman, S. a, McKelvey, K. S., Hayden, J., & Schwartz, M. K. (2006). Gene flow in  
522 complex landscapes: testing multiple hypotheses with causal modeling. *The*  
523 *American Naturalist*, 168(4), 486–99. doi:10.1086/506976
- 524 Danecek, P., Auton, A., Abecasis, G., Albers, C. A., Banks, E., Depristo, M. A., ... Vcf, T.  
525 (2011). The variant call format and VCFtools. *Bioinformatics (Oxford, England)*,  
526 27(15), 2156–2158. doi:10.1093/bioinformatics/btr330
- 527 Ekblom, R., & Galindo, J. (2010). Applications of next generation sequencing in  
528 molecular ecology of non-model organisms. *Heredity*, 107(1), 1–15.  
529 doi:10.1038/hdy.2010.152
- 530 Enk, J., Rouillard, J., & Poinar, H. (2013). Quantitative PCR as a predictor of aligned  
531 ancient DNA. *Biotechniques*. doi:10.2144/000114114
- 532 Erickson, C. J. (1995). Feeding Sites for Extractive Foraging by the Aye-Aye, *Dauben-*  
533 *tonia madagascariensis*, 240, 235–240.
- 534 Frasier, C. L., Rakotonirina, J.-N., Razanajatovo, L. G., Nasolonjanahary, T. S.,  
535 Rasolonileniraka, Mamiaritiana, S. B., ... Louis, E. E. (2015). Expanding  
536 Knowledge on Life History Traits and Infant Development in the Greater Bamboo  
537 Lemur (*Prolemur simus*): Contributions from Kianjavato, Madagascar. *Primate*  
538 *Conservation*, 29(1), 75–86. doi:10.1896/052.029.0110
- 539 Giolai, M., Paajanen, P., Verweij, W., Percival-Alwyn, L., Baker, D., Witek, K., ... Clark, M. D.  
540 (2016). Targeted capture and sequencing of gene-sized DNA molecules.  
541 *BioTechniques*, 61(6), 315–322. doi:10.2144/000114484
- 542 Glen, A. S., Berry, O., Sutherland, D. ., Garretson, S., Robinson, T., & de Tores, P. J. (2010).  
543 Forensic DNA confirms intraguild killing of a chuditch (*Dasyurus geoffroii*) by a  
544 feral cat (*Felis catus*). *Conservation Genetics*, 11(September 2014), 1099–1101.  
545 doi:10.1007/s10592-009-9888-y
- 546 Gnirke, A., Melnikov, A., Maguire, J., Rogov, P., LeProust, E. M., Brockman, W., ...  
547 Nusbaum, C. (2009). Solution hybrid selection with ultra-long oligonucleotides  
548 for massively parallel targeted sequencing. *Nature Biotechnology*, 27(2), 182–  
549 189. doi:10.1038/nbt.1523
- 550 Gonder, M. K., Mortensen, H. M., Reed, F. A., De Sousa, A., & Tishkoff, S. A. (2007). Whole-  
551 mtDNA genome sequence analysis of ancient african lineages. *Molecular Biology*  
552 *and Evolution*, 24(3), 757–768. doi:10.1093/molbev/msl209
- 553 Goossens, B., Chikhi, L., Utami, S. S., de Ruiter, J., & Bruford, M. W. (2000). A multi-  
554 samples, multi-extracts approach for microsatellite analysis of faecal samples in  
555 an arboreal ape. *Conservation Genetics*, 1(2), 157–162.  
556 doi:10.1023/A:1026535006318
- 557 Gross, M. (2017). Primates in peril. *Current Biology*, 27(12), R573–R576.  
558 doi:10.1016/j.cub.2017.06.002
- 559 Hawkins, M. T. R., Hofman, C. A., Callicrate, T., Mcdonough, M. M., Tsuchiya, M. T. N., Ecer,  
560 E. L. I., & Errez, E. G. (2015). In-solution hybridization for mammalian  
561 mitogenome enrichment : pros , cons and challenges associated with

- 562 multiplexing degraded DNA. *Molecular Ecology Resources*. doi:10.1111/1755-  
563 0998.12448
- 564 Inoue, E., Inoue-Murayama, M., Takenaka, O., & Nishida, T. (2007). Wild chimpanzee  
565 infant urine and saliva sampled noninvasively usable for DNA analyses. *Primates*,  
566 (48), 156–159. doi:10.1007/s10329-006-0017-y
- 567 Johnsen, A., Kearns, A. M., Omland, K. E., & Anmarkrud, J. A. (2017). Sequencing of the  
568 complete mitochondrial genome of the common raven *Corvus corax* (Aves:  
569 Corvidae) confirms mitogenome-wide deep lineages and a paraphyletic  
570 relationship with the Chihuahuan raven *C. cryptoleucus*. *PLOS ONE*, 12(10),  
571 e0187316. doi:10.1371/journal.pone.0187316
- 572 Joost, S., Bonin, a, Bruford, M. W., Després, L., Conord, C., Erhardt, G., & Taberlet, P.  
573 (2007). A spatial analysis method (SAM) to detect candidate loci for selection:  
574 towards a landscape genomics approach to adaptation. *Molecular Ecology*,  
575 16(18), 3955–69. doi:10.1111/j.1365-294X.2007.03442.x
- 576 Kendall, K. C., Stetz, J. B., Boulanger, J., MacLeod, A. M. Y. C., Paetkau, D., & White, G. C.  
577 (2009). Demography and Genetic Structure of a Recovering Grizzly Bear  
578 Population. *The Journal of Wildlife Management*, 73(1), 3–16. doi:10.2193/2008-  
579 330
- 580 Kirillova, I. V., Zanina, O. G., Chernova, O. F., Lapteva, E. G., Trofimova, S. S., Lebedev, V. S.,  
581 ... Shapiro, B. (2015). An ancient bison from the mouth of the Rauchua River  
582 (Chukotka, Russia). *Quaternary Research*, 84(2), 232–245.  
583 doi:10.1016/j.yqres.2015.06.003
- 584 Kistler, L., Ratan, A., Godfrey, L. R., Crowley, B. E., Hughes, C. E., Lei, R., ... Perry, G. H.  
585 (2015). Comparative and population mitogenomic analyses of Madagascar 's  
586 extinct, giant 'subfossil' lemurs. *Journal of Human Evolution*, 79, 45–54.  
587 doi:10.1016/j.jhevol.2014.06.016
- 588 Kohn, M. H., & Wayne, R. K. (1997). Facts from faeces revisited. *TREE*, 12, 223–227.
- 589 Li, H. (2011). A statistical framework for SNP calling, mutation discovery, association  
590 mapping and population genetical parameter estimation from sequencing data.  
591 *Bioinformatics*, 27(21), 2987–2993. doi:10.1093/bioinformatics/btr509
- 592 Li, H. (2013). Aligning sequence reads, clone sequences and assembly contigs with  
593 BWA-MEM.
- 594 Li, H., & Durbin, R. (2009). Fast and accurate short read alignment with Burrows-  
595 Wheeler transform. *Bioinformatics*, 25(14), 1754–1760.  
596 doi:10.1093/bioinformatics/btp324
- 597 Li, H., Handsaker, B., Wysoker, A., Fennell, T., Ruan, J., Homer, N., ... Durbin, R. (2009).  
598 The Sequence Alignment/Map format and SAMtools. *Bioinformatics*, 25(16),  
599 2078–2079. doi:10.1093/bioinformatics/btp352
- 600 Lischer, H. E. L., & Excoffier, L. (2012). PGDSpider: an automated data conversion tool  
601 for connecting population genetics and genomics programs. *Bioinformatics*,  
602 28(2), 298–298. doi:10.1093/bioinformatics/btr642
- 603 McKenna, A., Hanna, M., Banks, E., Sivachenko, A., Cibulskis, K., Kernytsky, A., ... DePristo,  
604 M. A. (2010). The genome analysis toolkit: A MapReduce framework for  
605 analyzing next-generation DNA sequencing data. *Genome Research*, 20(9), 1297–  
606 1303. doi:10.1101/gr.107524.110
- 607 McMahan, B. J., Teeling, E. C., & Höglund, J. (2014). How and why should we implement  
608 genomics into conservation? *Evolutionary Applications*, 7(9), 999–1007.  
609 doi:10.1111/eva.12193

- 610 Mohandesan, E., Speller, C. F., Peters, J., Uerpmann, H., Uerpmann, M., Cupere, B. E. A. D.  
611 E., ... Burger, P. A. (2017). Combined hybridization capture and shotgun  
612 sequencing for ancient DNA analysis of extinct wild and domestic dromedary  
613 camel. *Molecular Ecology Resources*, 17, 300–313. doi:10.1111/1755-0998.12551
- 614 Morin, D. J., Kelly, M. J., & Waits, L. P. (2016). Monitoring coyote population dynamics  
615 with fecal DNA and spatial capture–recapture. *The Journal of Wildlife*  
616 *Management*, 80(5), 824–836. doi:10.1002/jwmg.21080
- 617 Morin, P. A., Wallis, J., Moore, J. J., Chakraborty, R., & Woodruff, D. S. (1993). Non-  
618 invasive sampling and DNA amplification for paternity exclusion, community  
619 structure, and phylogeography in wild chimpanzees. *Primates*, 34(3), 347–356.  
620 doi:10.1007/BF02382630
- 621 Nichols, R. V., Konigsson, H., Danell, K., & Spong, H. (2012). Browsed twig environmental  
622 DNA : diagnostic PCR to identify ungulate species. *Molecular Ecology Resources*,  
623 12, 983–989. doi:10.1111/j.1755-0998.2012.03172.x
- 624 Nielsen, E. E., Morgan, J. A. T., Maher, S. L., Edson, J., Gauthier, M., Pepperell, J., ...  
625 Ovenden, J. R. (2017). Extracting DNA from ‘jaws’: high yield and quality from  
626 archived tiger shark (*Galeocerdo cuvier*) skeletal material. *Molecular Ecology*  
627 *Resources*, 17(3), 431–442. doi:10.1111/1755-0998.12580
- 628 Oka, T., & Takenaka, O. (2001). Wild gibbons’ parentage tested by non-invasive DNA  
629 sampling and PCR-amplified polymorphic microsatellites. *Primates*, 42(1), 67–  
630 73. doi:10.1007/BF02640690
- 631 Orkin, J. D., Yang, Y., Yang, C., Yu, D. W., & Jiang, X. (2016). Cost-effective scat-detection  
632 dogs: unleashing a powerful new tool for international mammalian conservation  
633 biology. *Scientific Reports*, 6(1), 34758–34758. doi:10.1038/srep34758
- 634 Perry, G. H., Louis, E. E., Ratan, A., Bedoya-Reina, O. C., Burhans, R. C., Lei, R., ... Miller, W.  
635 (2013). Aye-aye population genomic analyses highlight an important center of  
636 endemism in northern Madagascar. *Proceedings of the National Academy of*  
637 *Sciences of the United States of America*, 110(15), 5823–8.  
638 doi:10.1073/pnas.1211990110
- 639 Perry, G. H., Marioni, J. C., Melsted, P., & Gilad, Y. (2010). Genomic-scale capture and  
640 sequencing of endogenous DNA from feces. *Molecular Ecology*, 19(24), 5332–44.  
641 doi:10.1111/j.1365-294X.2010.04888.x
- 642 Perry, G. H., Melsted, P., Marioni, J. C., Wang, Y., Bainer, R., Pickrell, J. K., ... Gilad, Y.  
643 (2012). Comparative RNA sequencing reveals substantial genetic variation in  
644 endangered primates. *Genome Research*, 22(4), 602–10.  
645 doi:10.1101/gr.130468.111
- 646 Perry, G. H., Reeves, D., Melsted, P., Ratan, A., Miller, W., Michelini, K., ... Gilad, Y. (2012).  
647 A genome sequence resource for the aye-aye (*Daubentonia madagascariensis*), a  
648 nocturnal lemur from Madagascar. *Genome Biology and Evolution*, 4(2), 126–35.  
649 doi:10.1093/gbe/evr132
- 650 Purcell, S., Neale, B., Todd-Brown, K., Thomas, L., Ferreira, M. A. R., Bender, D., ... Sham,  
651 P. C. (2007). REPORT PLINK : A Tool Set for Whole-Genome Association and  
652 Population-Based Linkage Analyses. *The American Journal of Human Genetics*,  
653 81(September), 559–575. doi:10.1086/519795
- 654 Quéméré, E., Crouau-Roy, B., Rabarivola, C., Louis, E. E., & Chikhi, L. (2010). Landscape  
655 genetics of an endangered lemur (*Propithecus tattersalli*) within its entire  
656 fragmented range. *Molecular Ecology*, 19(8), 1606–21. doi:10.1111/j.1365-  
657 294X.2010.04581.x



- 658 Rakoto-Joseph, O., Garde, F., David, M., Adelard, L., & Randriamanantany, Z. A. (2009).  
659 Development of climatic zones and passive solar design in Madagascar. *Energy*  
660 *Conversion and Management*, 50(4), 1004–1010.  
661 doi:10.1016/j.enconman.2008.12.011
- 662 Ralainasolo, F. B., Ratsimbazafy, J. H., & Stevens, N. J. (2006). Behavior and diet of the  
663 Critically Endangered *Eulemur cinereiceps* in Manombo forest , southeast  
664 Madagascar. *Madagascar Conservation and Development*, 3(1).
- 665 Randimbiharirinirina, D. R., Raharivololona, B. M., Hawkins, M. T. R., Frasier, C. L.,  
666 Culligan, R., Sefczek, T., ... Louis, E. E. (2017). Behavior and Ecology of male aye-  
667 ayes (*Daubentonia madagascariensis*) in the Kianjavato Classified Forest ,  
668 southeastern Madagascar. *Folia Primatologica, Manuscript*.
- 669 Randimbiharirinirina, D., Sefczek, T., Raharivololona, B. M., Andriamalala, Y.,  
670 Ratsimbazafy, Jonah, & Louis, E. E. (2017). Aye-Aye *Daubentonia*  
671 *madagascariensis* (Gmelin, 1788) Madagascar (2016). In C. Schwitzer, R. A.  
672 Mittermeier, Rylands, Anthony B., F. chiozza, E. Williamson, E. Macfie, ... A. Cotton  
673 (Eds.), *Primates in Peril The world's 25 most endangered primates 2016-2018*.
- 674 Ravaloharimanitra, M., Ratolojanahary, T., Rafalimandimby, J., Rajaonson, A.,  
675 Rakotonirina, L., Rasolofoharivelo, T., ... King, T. (2011). Gathering Local  
676 Knowledge in Madagascar Results in a Major Increase in the Known Range and  
677 Number of Sites for Critically Endangered Greater Bamboo Lemurs (*Prolemur*  
678 *simus*). *International Journal of Primatology*, 32(3), 776–792.  
679 doi:10.1007/s10764-011-9500-4
- 680 Robinson, J. T., Thorvaldsdottir, H., Winckler, W., Guttman, M., Lander, E. S., Getz, G., &  
681 Mesirov, J. P. (2012). Integrative Genomics Viewer. *Nature Biotechnology*, 29(1),  
682 24–26. doi:10.1038/nbt.1754.Integrative
- 683 Sastre, N., Francino, O., Sanchez, A., & Ramirez, O. (2009). Sex identification of wolf  
684 (*Canis lupus*) using non-invasive samples, (July 2015). doi:10.1007/s10592-008-  
685 9565-6
- 686 Schmieder, R., & Edwards, R. (2011). Quality control and preprocessing of metagenomic  
687 datasets. *Bioinformatics (Oxford, England)*, 27(6), 863–864.  
688 doi:10.1093/bioinformatics/btr026
- 689 Schubert, G., Stoneking, C. J., Arandjelovic, M., Boesch, C., Eckhardt, N., Hohmann, G., ...  
690 Vigilant, L. (2011). Male-mediated gene flow in patrilocal primates. *PloS One*,  
691 6(7), e21514–e21514. doi:10.1371/journal.pone.0021514
- 692 Schwitzer, C., Mittermeier, R. a., Davies, N., Johnson, S. E., Ratsimbazafy, J. H.,  
693 Razafindramanana, J., ... Nash, S. (2013). *Lemurs of Madagascar: a strategy for*  
694 *their conservation 2013-2016* (No. 9781934151624).
- 695 Shafer, A., Wolf, J., Alves, P., Bergström, L., .M, B., Brannstrom, I., ... Zielinski, P. (2015).  
696 Genomics and the challenging translation into conservation practice. *Trends in*  
697 *Ecology & Evolution*2, 30(2), 78–87. doi:10.1016/j.tree.2014.11.009
- 698 Sikes, R. S., & Gannon, W. L. (2011). Guidelines of the American Society of Mammalogists  
699 for the use of wild mammals in research. *Journal of Mammalogy*, 92(1), 235–253.  
700 doi:10.1644/10-MAMM-F-355.1
- 701 Smiley, T., Spelman, L., Lukasik-, M., Mukherjee, J., Ph, D. V. M. D., Kaufman, G., ...  
702 Cranfield, M. (2010). Noninvasive Saliva Collection Techniques for Free-Ranging  
703 Mountain Gorillas and Captive Eastern Gorillas E. *Journal of Zoo and Wildlife*  
704 *Medicine*, 41(2), 201–209.
- 705 Snyder-mackler, N., Majoros, W. H., Yuan, M. L., Shaver, A. O., Gordon, J. B., Kopp, G. H., ...  
706 Alberts, S. C. (2016). Ef fi cient Genome-Wide Sequencing and Noninvasively

- 707 Collected Samples. *Genetics*, 203(June), 699–714.  
708 doi:10.1534/genetics.116.187492
- 709 Sterling, E. J. (1994a). Aye-aye: Specialists on Structurally Defended Resources. *Folia*  
710 *Primatologica*, 62, 142–154.
- 711 Sterling, E. J. (1994b). Taxonomy and Distribution of *Daubentonia madagascariensis*: A  
712 Historical Perspective. *Folia Primatologica*, 62, 8–13.
- 713 Sterling, E. J., & McCreless, E. E. (2007). Adaptations in the Aye-aye : A Review. In *Lemurs*  
714 (pp. 159–184).
- 715 Sundqvist, A.-K., Ellegren, H., & Vila, C. (2008). Wolf or dog ? Genetic identification of  
716 predators from saliva collected around bite wounds on prey. *Conservation Ge*, 9,  
717 1275–1279. doi:10.1007/s10592-007-9454-4
- 718 Tan, C. L. (1999). Group composition, home range size, and diet of three sympatric  
719 bamboo lemur species (genus *Haplemur*) in Ranomafana National Park,  
720 Madagascar. *International Journal of Primatology*, 20(4), 547–566.
- 721 Valiere, N., & Taberlet, P. (2000). Urine collected in the field as a source of DNA for  
722 species and individual identification, 2150–2153.
- 723 Wheat, R. E., Allen, J. M., Miller, S. D. L., Wilmers, C. C., & Levi, T. (2016). Environmental  
724 DNA from Residual Saliva for Efficient Noninvasive Genetic Monitoring of Brown  
725 Bears (*Ursus arctos*). *PloS One*, 1–18. doi:10.5281/zenodo.58748
- 726 Wright, P. C., Johnson, S. E., Irwin, M. T., Jacobs, R., Schlichting, P., Lehman, S., ... Tan, C.  
727 (2008). The Crisis of the Critically Endangered Greater Bamboo Lemur (*Prolemur*  
728 *simus*), 2008(23), 5–17.  
729

730

## Supporting information

**Table A1. Sequencing pool parameters for shotgun sequencing of eDNA libraries.**

| Sample | Conc. ng/ul | Vol. in pool | Total ng | % pool by amount |
|--------|-------------|--------------|----------|------------------|
| MSR01  | 0.26        | 2            | 0.528    | 6.81             |
| MSR44  | 0.17        | 5.88         | 0.999    | 6.58             |
| MSR46  | 0.46        | 2.17         | 0.999    | 6.58             |
| MSR50  | 0.39        | 2.56         | 0.998    | 6.58             |
| MSR58  | 0.96        | 1.04         | 0.994    | 6.58             |
| BTS04  | 0.53        | 1.89         | 1        | 6.6              |
| BTS38  | 0.03        | 1            | 0.03     | 0.2              |
| BTS60  | 0.70        | 1.43         | 1        | 6.59             |
| BTS108 | 0.20        | 1            | 0.2      | 1.32             |
| BTS112 | 0.34        | 2.94         | 0.999    | 6.58             |

**Table A2. Sequencing pool parameters for MitoBait captures from eDNA samples.**

| Sample | Conc. ng/ul | Vol. in pool | ng total | % pool by amount |
|--------|-------------|--------------|----------|------------------|
| BTS04  | 0.36        | 11           | 3.96     | 6.7              |
| BTS27  | 6.8         | 3            | 4.08     | 6.9              |
| BTS60  | 0.515       | 7.8          | 4.02     | 6.8              |
| BTS68  | 0.633       | 6.3          | 3.99     | 6.75             |
| BTS102 | 4.4         | 0.8          | 3.52     | 5.96             |
| BTS105 | 1.56        | 2.6          | 4.06     | 6.87             |
| BTS112 | 0.23        | 16.7         | 2.87     | 4.86             |
| MSR01  | 0.43        | 9.4          | 4        | 6.77             |
| MSR23  | 0.546       | 7.3          | 3.99     | 6.75             |
| MSR37  | 0.389       | 10.3         | 4.01     | 6.79             |
| MSR39  | 0.848       | 4.7          | 3.9      | 6.75             |
| MSR44  | 0.003       | 10           | 0.03     | 0.05             |
| MSR46  | 0.003       | 10           | 0.03     | 0.05             |
| MSR50  | 0.0         | 10           | 0        | 0.00             |
| MSR56  | 0.932       | 4.3          | 4.01     | 6.79             |
| MSR58  | 0.209       | 10           | 2.09     | 3.54             |
| MSR62  | 2.66        | 1.5          | 3.99     | 6.75             |
| BTS108 | 0.42        | 6            | 2.5      | N/A              |
| BTS38  | 2.2         | 1.8          | 3.96     | N/A              |
